# Supplementary material for: Exploring the formation of coordination polymers based on dicarboxylic ligands derived from fluorene and their adsorption abilities
Source: Royal Society of Chemistry journal article supplement (doi:10.1039/d4ce01201a), 2025-01-01
Supplement: d4ce01201a1.pdf [file d4ce01201a1.pdf]

## Exploring the formation of Coordination Polymers based on dicarboxylic ligand derived from fluorene and their adsorption abilities

Nizami Israfilov,<sup>a</sup> Nathalie Kyritsakas,<sup>b</sup> Abdelaziz Jouaiti<sup>a\*</sup> and Sylvie Ferlay<sup>a\*</sup>

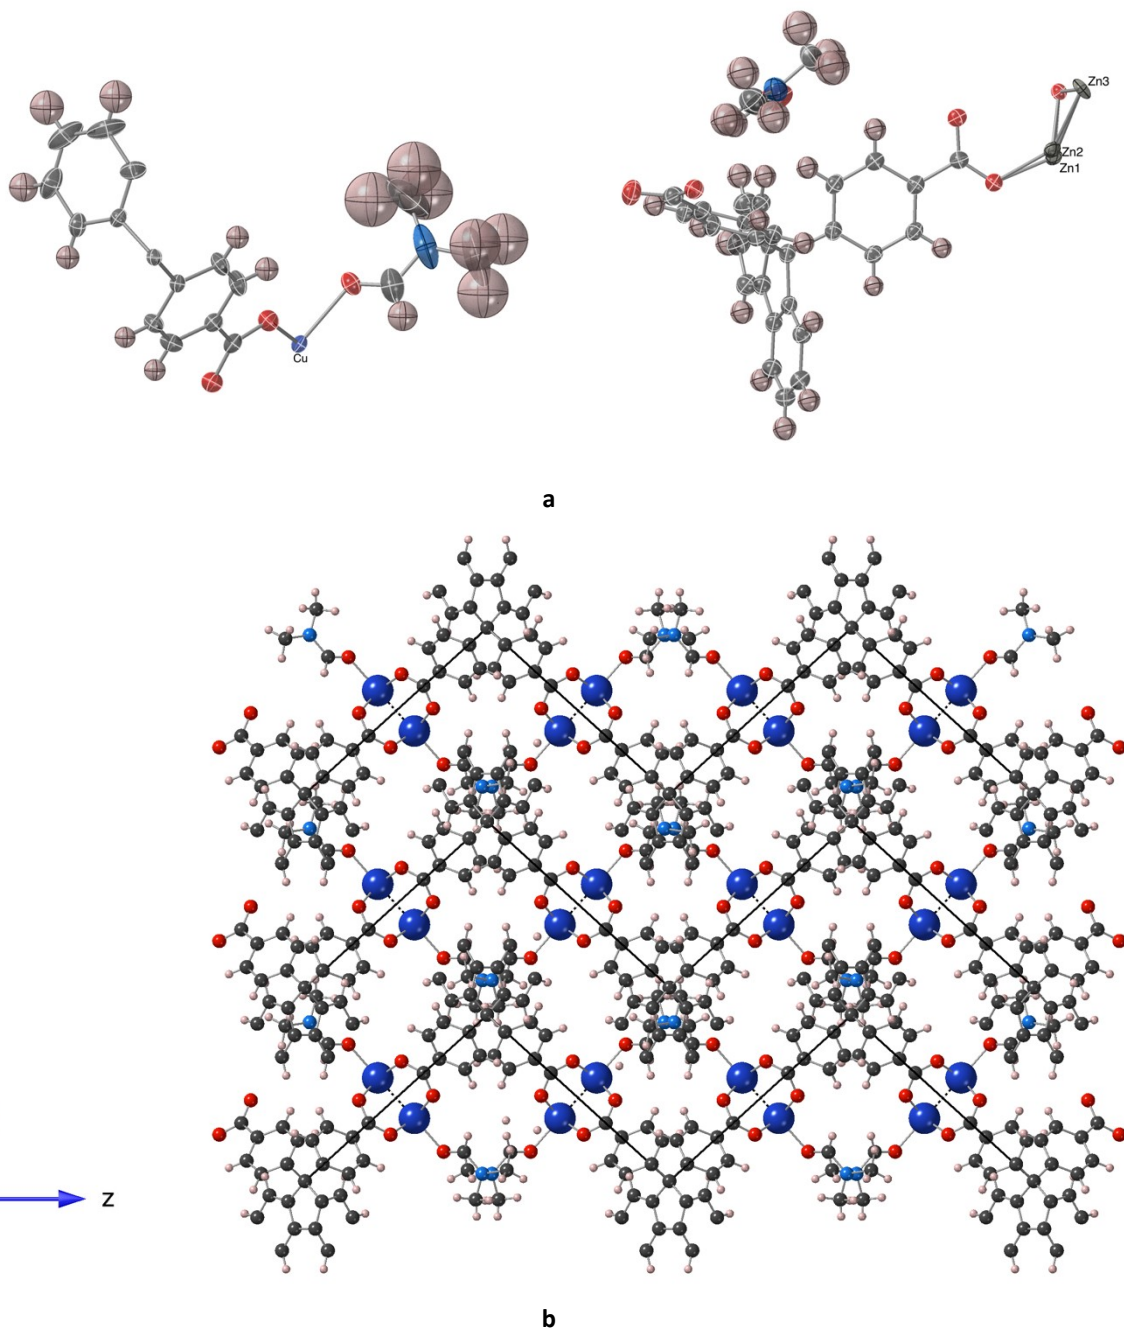

**Figures S1:** a) The asymmetric units for of **1** (left) and **2**(right). Thermal ellipsoids are at 50% probability b) the stacking of the planes in **1**

| CCDC                                                 | 2383979<br>(for comparison)                                                                                      | 2379879                                                                                                       | 2379878                                                                                                                |
|------------------------------------------------------|------------------------------------------------------------------------------------------------------------------|---------------------------------------------------------------------------------------------------------------|------------------------------------------------------------------------------------------------------------------------|
|                                                      | <b>1</b>                                                                                                         | <b>4</b>                                                                                                      | <b>3</b>                                                                                                               |
| Empirical formula                                    | C <sub>30</sub> H <sub>23</sub> CuNO <sub>5</sub> , solvent                                                      | C <sub>27</sub> H <sub>18</sub> O <sub>5</sub> Zn, solvent                                                    | C <sub>27</sub> H <sub>18</sub> CuO <sub>5</sub>                                                                       |
| Formula weight                                       | 541.03                                                                                                           | 487.78                                                                                                        | 485.95                                                                                                                 |
| Temperature                                          | 120 (2) K                                                                                                        |                                                                                                               | 173(2) K                                                                                                               |
| Wavelength                                           | 0.71073 Å                                                                                                        |                                                                                                               |                                                                                                                        |
| Crystal system, space group                          | Orthorhombic <i>C mca</i>                                                                                        |                                                                                                               | Monoclinic, <i>C 2/c</i>                                                                                               |
| Unit 2D Cooell dimensions                            | a = 23.4998(8) Å $\alpha$ = 90 deg.<br>b = 18.6597(6) Å $\beta$ = 90 deg.<br>c = 17.5655(6) Å $\gamma$ = 90 deg. | a = 23.673(4) Å $\alpha$ = 90 deg.<br>b = 18.677(4) Å $\beta$ = 90 deg.<br>c = 17.763(4) Å $\gamma$ = 90 deg. | a = 28.644(6) Å $\alpha$ = 90 deg.<br>b = 7.1941(14) Å $\beta$ = 113.655(4) deg.<br>c = 23.764(5) Å $\gamma$ = 90 deg. |
| Volume                                               | 7702.5(4) Å <sup>3</sup>                                                                                         | 7854(3) Å <sup>3</sup>                                                                                        | 4485.6(16)                                                                                                             |
| Z, Calculated density                                | 8, 0.933 Mg/m <sup>3</sup>                                                                                       | 8, 0.825 Mg/m <sup>3</sup>                                                                                    | 8, 1.439 Mg/m <sup>3</sup>                                                                                             |
| Absorption coefficient                               | 0.594 mm <sup>-1</sup>                                                                                           | 0.646 mm <sup>-1</sup>                                                                                        | 1.010 mm <sup>-1</sup>                                                                                                 |
| F(000)                                               | 2232                                                                                                             | 2000                                                                                                          | 1992                                                                                                                   |
| Crystal size                                         | 0.150 x 0.120 x 0.100 mm                                                                                         | 0.16 x 0.12 x 0.10 mm                                                                                         | 0.12 x 0.09 x 0.09 mm                                                                                                  |
| Theta range for data collection                      | 2.472 to 27.898 deg.                                                                                             | 1.720 to 27.932 deg.                                                                                          | 2.88 to 27.00 deg.                                                                                                     |
| Limiting indices                                     | -30<=h<=26<br>-24<=k<=23<br>-23<=l<=23                                                                           | -31<=h<=28,<br>-24<=k<=16,<br>-23<=l<=22                                                                      | -36<=h<=36,<br>-9<=k<=7,<br>-30<=l<=24                                                                                 |
| Reflections collected / unique                       | 44079 / 4717 [R(int) = 0.0763]                                                                                   | 28888 / 4819 [R(int) = 0.1231]                                                                                | 12288/ 4300 [R(int) = 0.0347]                                                                                          |
| Goodness-of-fit on F <sup>2</sup>                    | 1.046                                                                                                            | 1.021                                                                                                         | 1.090                                                                                                                  |
| Final R indices [ <i>I</i> >2 $\sigma$ ( <i>I</i> )] | R1 = 0.0464, wR2 = 0.1285                                                                                        | R1 = 0.0932, wR2 = 0.2610                                                                                     | R1 = 0.0641, wR2 = 0.0737                                                                                              |
| R indices (all data)                                 | R1 = 0.0631, wR2 = 0.1400                                                                                        | R1 = 0.1622, wR2 = 0.3010                                                                                     | R1 = 0.1694, wR2 = 0.1812                                                                                              |
| Largest diff. peak and hole                          | 0.656 and -0.633 e. Å <sup>3</sup>                                                                               | 0.614 and -1.373 e. Å <sup>3</sup>                                                                            | 1.911 and -1.468 e. Å <sup>3</sup>                                                                                     |

**Table S1.** Crystallographic data for **1** (for comparison), **4** and **3**

## Compound 4 (isomorphous to 1)

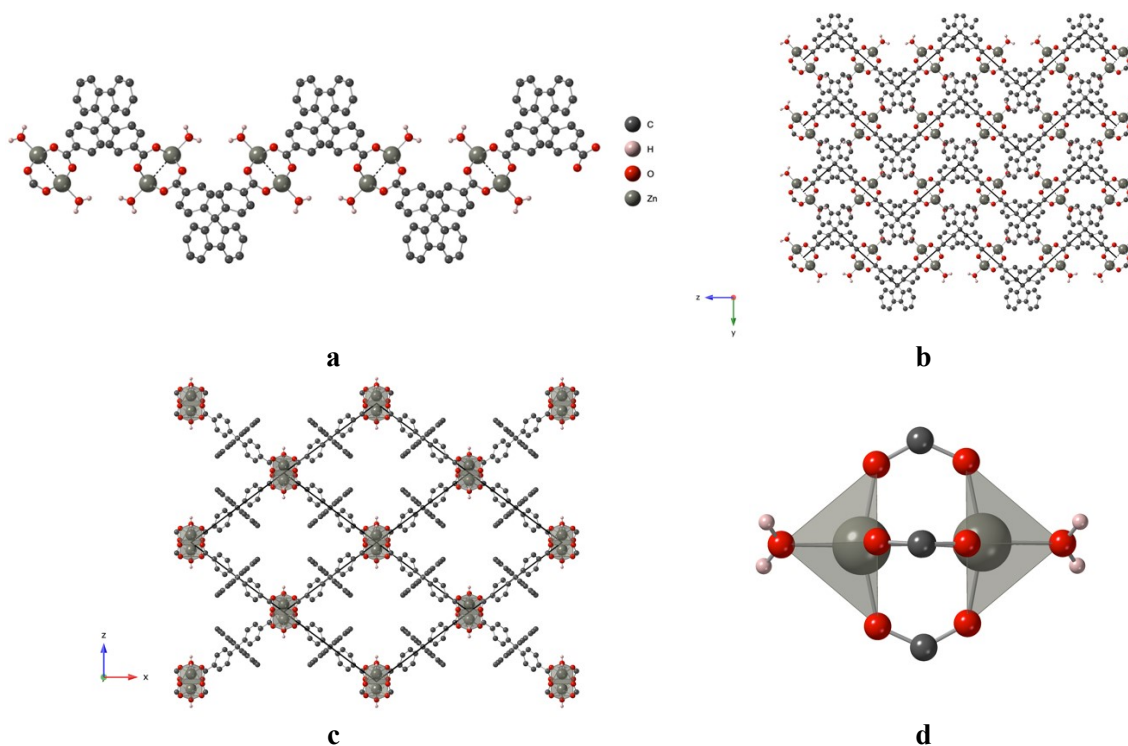

**Figures S2:** Portion of the X-ray structure for **4** showing a) the formation of the 2D neutral coordination network resulting from the bridging of consecutive ligand  $L^{2-}$  by  $Zn^{2+}$  b) view of the corrugated plane along the  $b$  axis, c) view of the grid in the  $xOz$  plane c) details of the environment of the  $Zn^{2+}$  cations. H atoms are not all presented for clarity.

|                               | <b>1</b>   | <b>4</b> | <b>3</b>   |
|-------------------------------|------------|----------|------------|
| M–O (Å)                       | 1.9619(15) | 2.032(5) | 1.951(3)   |
|                               | 1.9684(16) | 2.035(5) | 1.953(3)   |
| M–O <sub>(solvent)</sub> (Å)  | 2.142(3)   | 1.990(7) | 1.972(3)   |
| M–M (Å)                       | 2.6302(7)  | 2.994(2) | 1.980(3)   |
| $\alpha$ angle (figure 1) (°) | 102.19     | 103.88   | 2.205(3)   |
|                               |            |          | 2.5938(11) |
|                               |            |          | 101.82     |

**Table S2.** Selected bonds lengths (Å) around the M(II) ions for **1**, **4** and **3**

## Compound 3

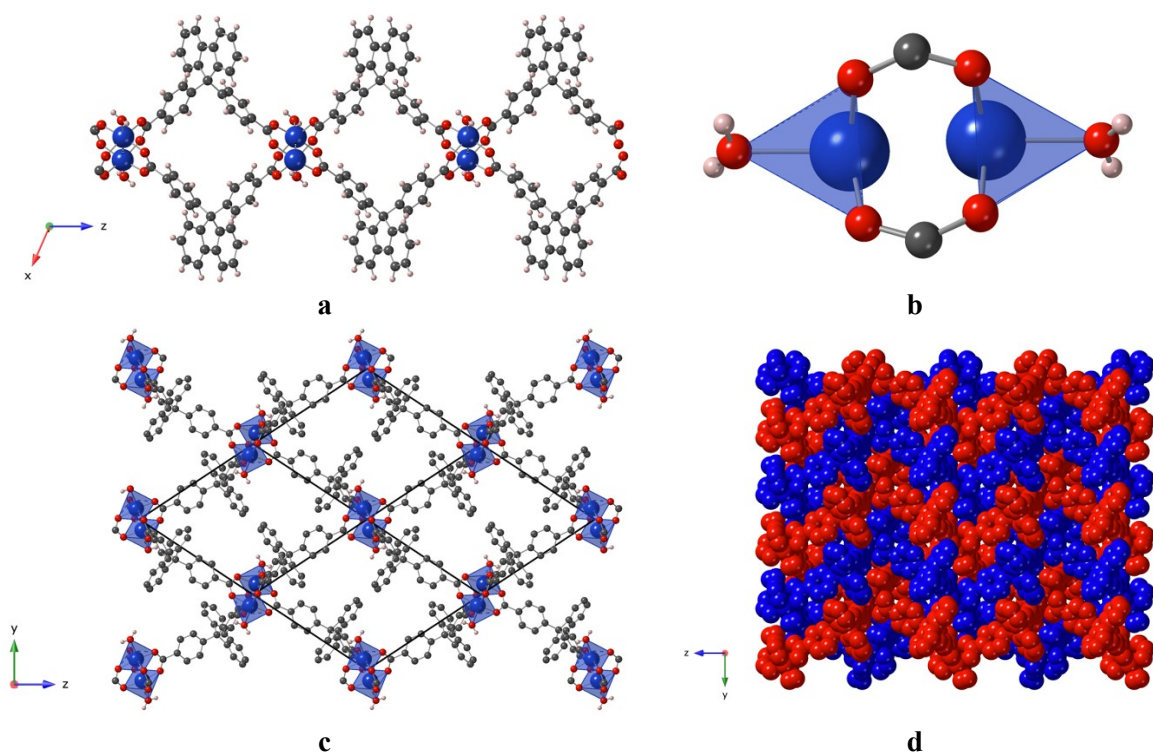

**Figures S3:** Portion of the X-ray structure for **3** showing a) the formation of the 2D neutral coordination network resulting from the bridging of consecutive ligand  $\text{L}^{2-}$  by  $\text{Cu}^{2+}$  b) details of the environment of the  $\text{Cu}^{2+}$  cations c) view of the grid in the  $yOz$  plane, and d) space filling representation of interpenetration of two 2D grids. H atoms are not all presented for clarity.

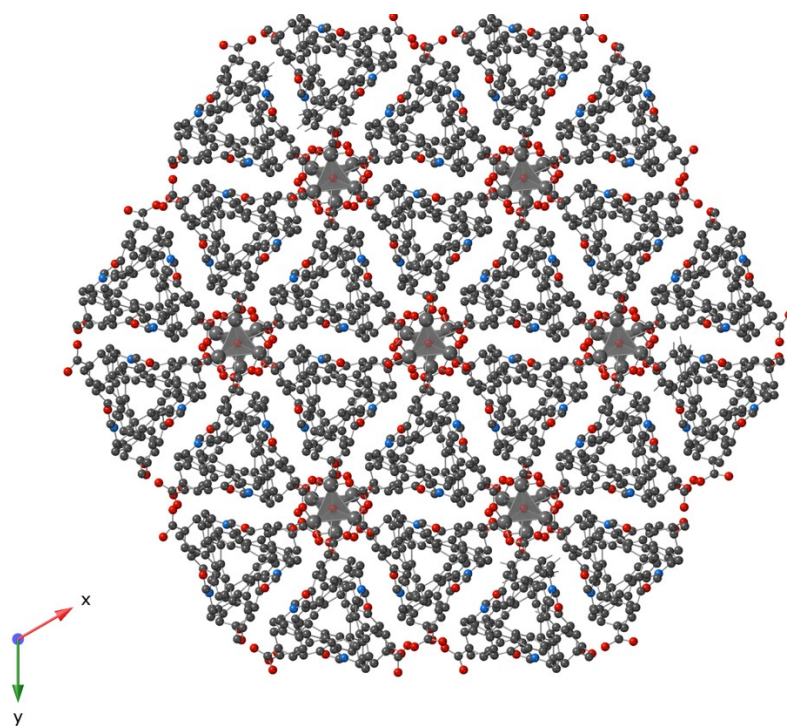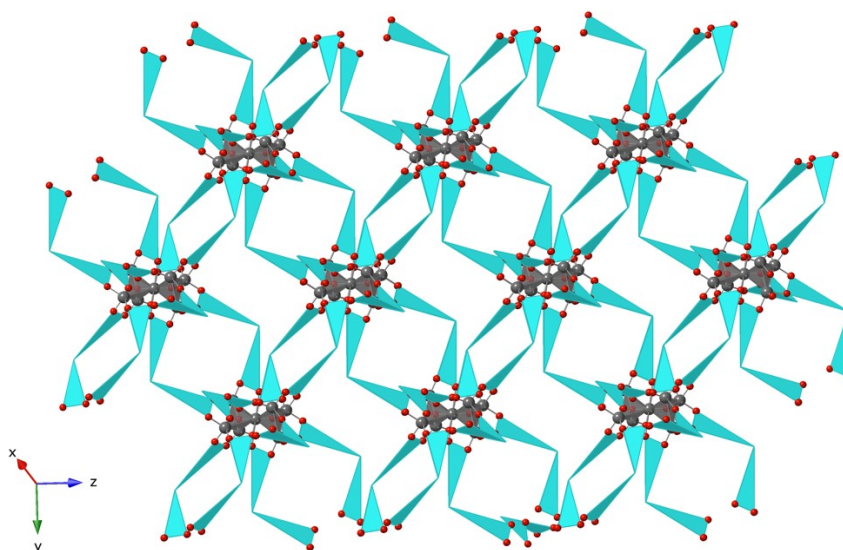

**Figures S4:** Portion of the X-ray structure for 3D **2** showing the resulting 3D coordination polymer, with uncoordinated DMF molecules located in the free space. H atoms and the disordered Zn cations are not represented, for the sake of clarity.

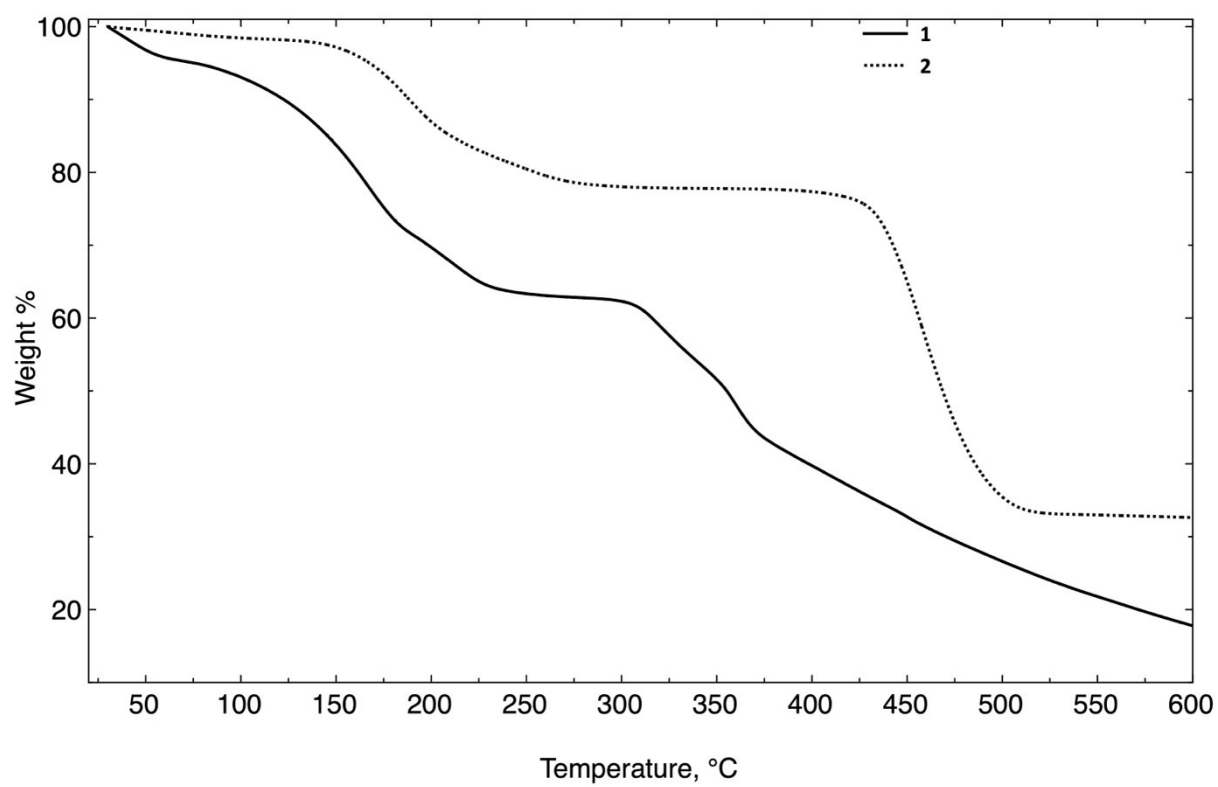

**Figure S5.** For **1** and **2**, TGA traces between  $T = 30^{\circ}\text{C}$  and  $500^{\circ}\text{C}$ .

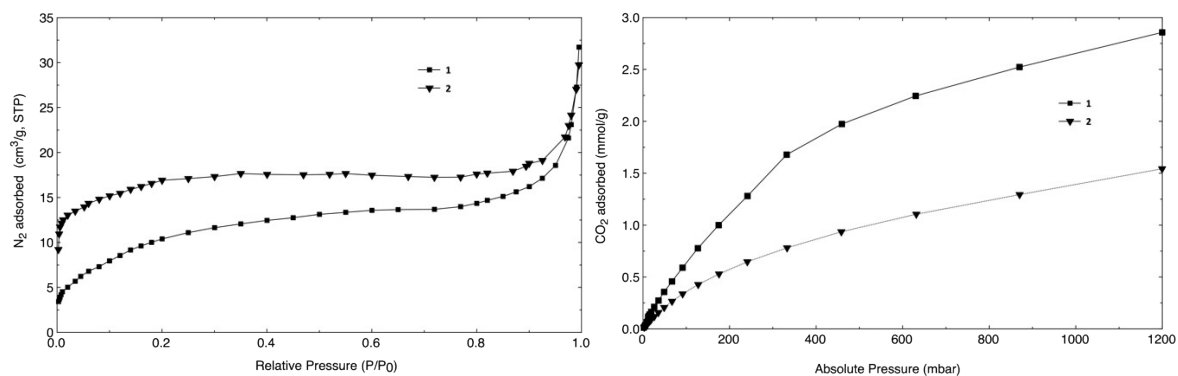

**Figures S6.** For **1** and **2**, adsorption isotherms a)  $N_2$  at  $T = 77$  and b)  $CO_2$  at  $T = 273$  K.



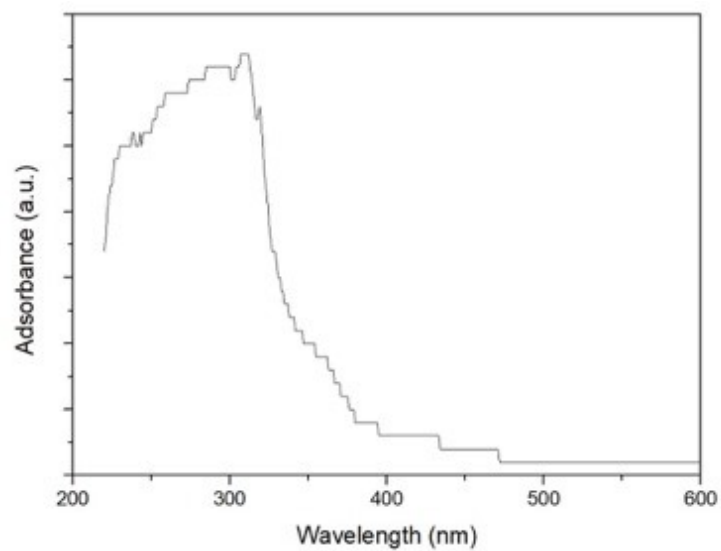

**Figure S7.** For **2**, solid-state reflectance spectra at RT.

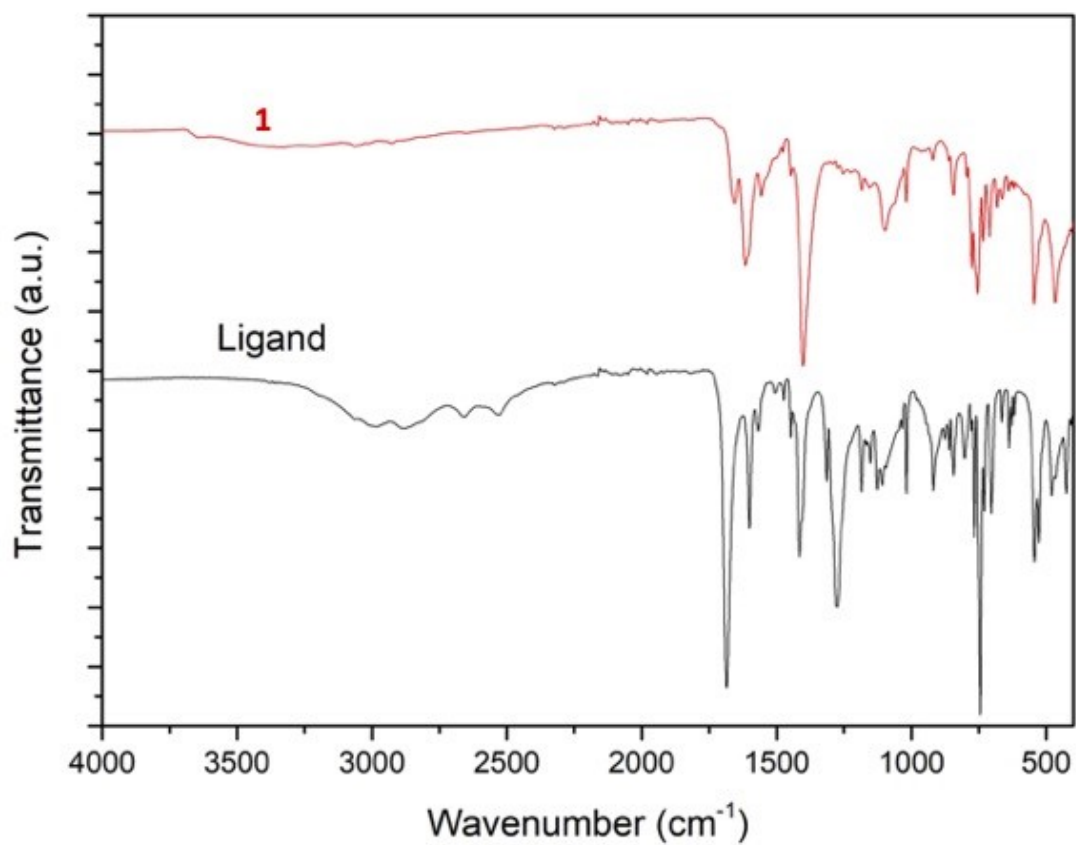

**Figure S8.** For **1**, IR spectrum in the solid-state (ATR), compared to the one of the ligand  $\text{H}_2\text{L}$ .



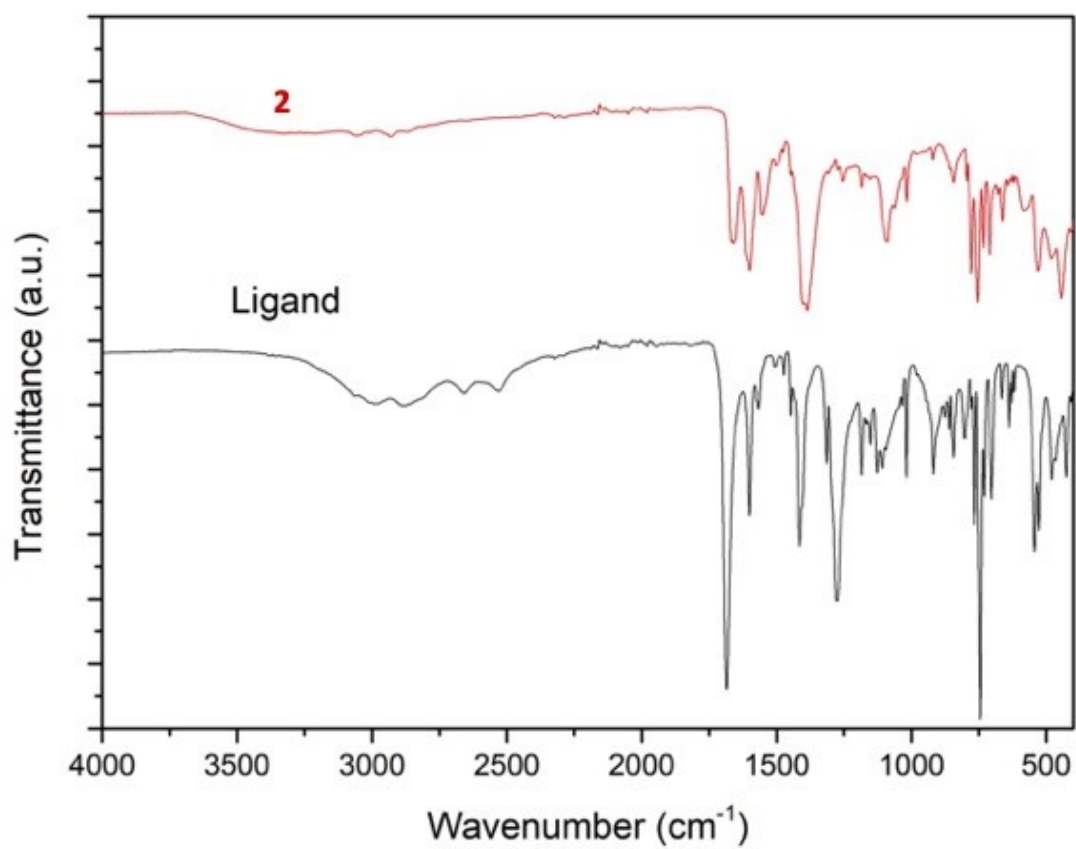

**Figure S9.** For **2**, IR spectrum in the solid-state (ATR), compared to the one of the ligand H<sub>2</sub>L.

---
